# Supplementary material
Source: PubMed Central journal article supplement (PMC6583873)
Supplement: jamacardiol-3-703-s001.pdf [file jamacardiol-3-703-s001.pdf]

## Supplementary Online Content

Lindgren MP, PirouziFard M, Smith JG, Sundquist J, Sundquist K, Zöller B. A Swedish nationwide adoption study of the heritability of heart failure. *JAMA Cardiol*. Published online July 11, 2018. doi:10.1001/jamacardio.2018.1919

**eFigure.** Schematics of Exclusions in the Enrollment of Swedish Born Adoptees

**eTable 1.** International Classification of Diseases and Related Health Problems (ICD) Codes Used for Studied Comorbidities

**eTable 2.** Comorbidities in Biological and Adoptive Parents With and Without Heart Failure

**eTable 3.** Odds Ratio of Heart Failure (HF) in Adoptees, Stratified by Number of Affected Biological Parents (Cohort Study). Individuals With Cardiomyopathies Included

**eTable 4.** Hazard Ratio of Heart Failure in Adoptees, Stratified by Affected Parent

**eTable 5.** Heritability of Heart Failure Based on Estimated Population Prevalence and Tetrachoric Correlation in the Case-Control Study. Individuals With Cardiomyopathies Included

**eTable 6.** Heritability of Heart Failure Based on Estimated Population Prevalence and Tetrachoric Correlation in the Case-Control study. Individuals With Cardiomyopathy Excluded

**eTable 7.** Odds Ratio of Heart Failure in Adoptees, Stratified by Affected Parent (Cohort Study). Only Adoptees With Both Biological and Both Adoptive Parents Identified Included

**eTable 8.** Odds Ratio of Heart Failure (HF) in Adoptees, Stratified by Affected Parent (Case-Control Study). Only Adoptees With Both Biological and Both Adoptive Parents Identified included

**eTable 9.** Odds Ratio of Heart Failure (HF) in Adoptees, Stratified by Affected Biological Parents, in Relation to Coronary Heart Disease (CHD) (Cohort Design). Individuals With Cardiomyopathies Included

**eTable 10.** Odds Ratio of Heart Failure (HF) in Adoptees, Stratified by Affected Biological Parents and by Sex (Cohort Study). Individuals with cardiomyopathies included

This supplementary material has been provided by the authors to give readers additional information about their work.

**eFigure 1. Schematics of Exclusions in the Enrollment of Swedish-Born Adoptees**

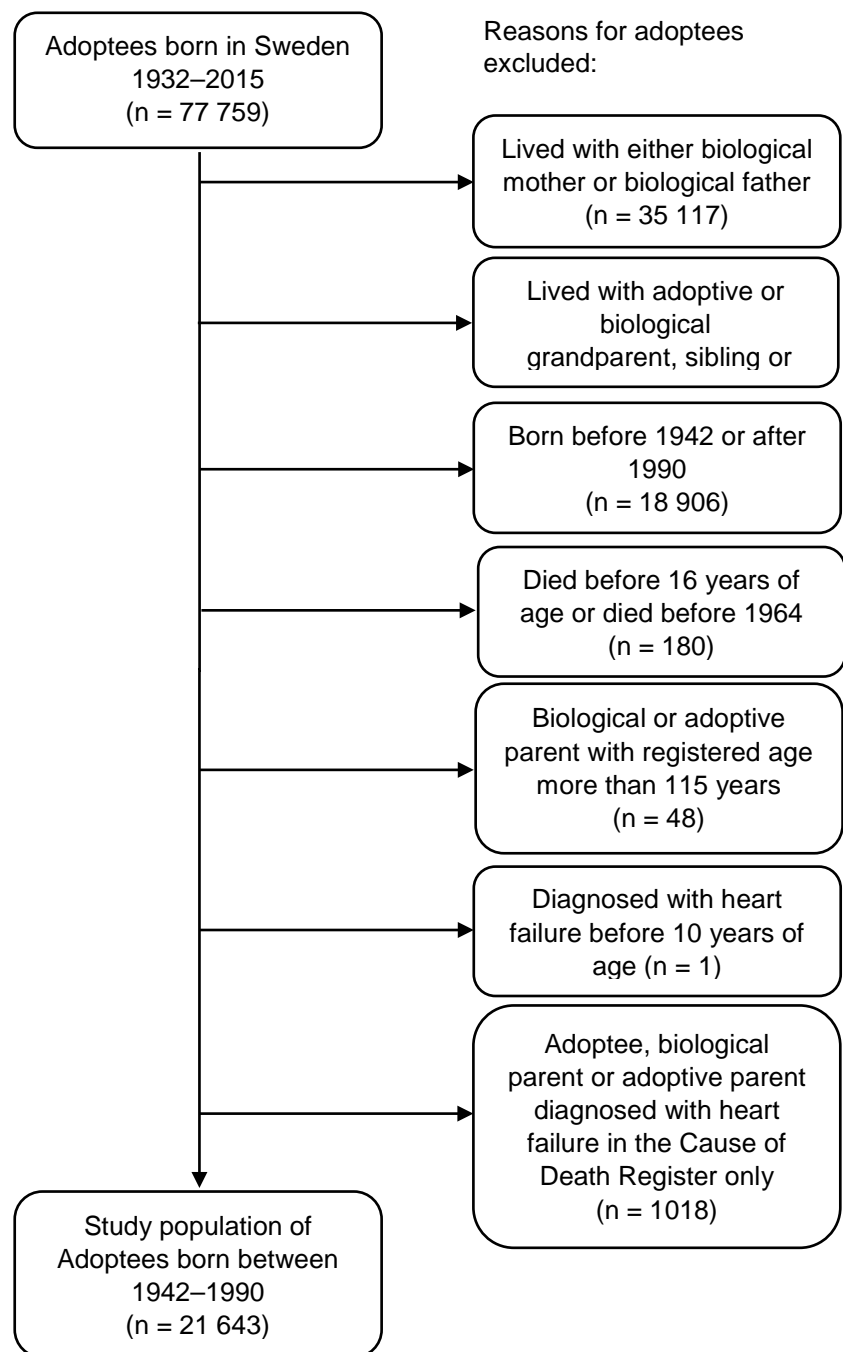

**eTable 1. International Classification of Diseases and Related Health Problems (ICD) Codes Used for Studied Comorbidities**

| <b>Diagnosis</b>                      | <b>ICD 10</b>    | <b>ICD 9</b>           | <b>ICD 8</b>                | <b>ICD 7</b>                      |
|---------------------------------------|------------------|------------------------|-----------------------------|-----------------------------------|
| Coronary heart disease                | I20-I25          | 410-414                | 410-414                     | 420                               |
| Hypertension                          | I10-I15          | 401-405                | 400-404                     | 440-447                           |
| Valvular heart disease                | I05-I09, I33-I39 | 391, 394-398, 421, 424 | 391, 393, 394-398, 421, 424 | 401.10, 401.11, 410-414, 421, 430 |
| Diabetes mellitus                     | E10-E14          | 250                    | 250                         | 260                               |
| Chronic obstructive pulmonary disease | J40-J47          | 490-496                | 490-493                     | 241, 502, 527.10, 527.11          |

**eTable 2. Comorbidities in Biological and Adoptive Parents With and Without Heart Failure**

|                                                    | <b>No heart failure</b> | <b>Heart failure</b> | <b>P-value<sup>a</sup></b> |
|----------------------------------------------------|-------------------------|----------------------|----------------------------|
| <b>Biological parents</b>                          | (n = 39 629 )           | (n = 3 657)          |                            |
| Coronary heart disease (CHD) <sup>b</sup>          | 7 310 (18.45)           | 2 305 (63.03)        | <0.0001                    |
| Hypertension <sup>b</sup>                          | 10 824 (27.31)          | 1 929 (52.75)        | <0.0001                    |
| Valvular heart disease <sup>b</sup>                | 1 120 (2.83)            | 645 (17.64)          | <0.0001                    |
| Diabetes mellitus <sup>b</sup>                     | 5 318 (13.42)           | 1 302 (35.60)        | <0.0001                    |
| Chronic obstructive pulmonary disease <sup>b</sup> | 5 614 (14.17)           | 1 281 (35.03)        | <0.0001                    |
| Cardiomyopathy <sup>b</sup>                        | 216 (0.55)              | 310 (8.48)           | <0.0001                    |
| <b>Adoptive parents</b>                            | (n = 31 044)            | (n = 3 972)          |                            |
| Coronary heart disease <sup>b</sup>                | 7 090 (22.84)           | 2 477 (62.36)        | <0.0001                    |
| Hypertension <sup>b</sup>                          | 9 458 (30.47)           | 1 984 (49.95)        | <0.0001                    |
| Valvular heart disease <sup>b</sup>                | 1 228 (3.96)            | 829 (20.87)          | <0.0001                    |
| Diabetes mellitus <sup>b</sup>                     | 4 076 (13.13)           | 1 041 (26.21)        | <0.0001                    |
| Chronic obstructive pulmonary disease <sup>b</sup> | 3 013 (9.71)            | 867 (21.83)          | <0.0001                    |
| Cardiomyopathy <sup>b</sup>                        | 167 (0.54)              | 219 (5.51)           | <0.0001                    |

<sup>a</sup> Chi-square test. <sup>b</sup> number of observations (%).

**eTable 3. Odds Ratio<sup>a</sup> of Heart Failure (HF) in Adoptees, Stratified by Number of Affected Biological Parents (Cohort Study). Individuals With Cardiomyopathies Included**

|                                      | <b>No biological parental HF</b> | <b>One biological parent with HF only</b> | <b>Both biological parents affected with HF</b> |
|--------------------------------------|----------------------------------|-------------------------------------------|-------------------------------------------------|
| Person-years at risk                 | 844 228                          | 156 859                                   | 10 151                                          |
| Cases/persons at risk                | 135/18192                        | 53/3245                                   | 6/206                                           |
| Incidence rate per 1000 person years | 0.16 (0.13-0.19)                 | 0.34 (0.26-0.44)                          | 0.59 (0.27-1.32)                                |
| Incidence ratio                      | 1 [Reference]                    | 2.11 (1.53-2.89)                          | 3.70 (1.48-7.86)                                |
| <i>Odds ratio (95% CI)</i>           |                                  |                                           |                                                 |
| Model 1                              | 1 [Reference]                    | 2.22 (1.61-3.06)                          | 4.01 (1.75-9.20)                                |
| Model 2                              | 1 [Reference]                    | 1.47 (1.06-2.03)                          | 2.12 (0.91-4.91)                                |
| Model 3                              | 1 [Reference]                    | 1.40 (0.99-1.98)                          | 1.97 (0.80-4.87)                                |

Abbreviations: CI, confidence interval. Model 1=univariate model; Model 2=adjusted for adoptee birth year, sex, county, and education; Model 3=adjusted for adoptee birth year, sex, county, education, coronary heart disease, hypertension, valvular heart disease, diabetes mellitus, and chronic obstructive pulmonary disease. <sup>a</sup> Risks are presented as odds ratios (95 % confidence interval) derived from unconditional logistic regression. <sup>b</sup> Reference group.

**eTable 4. Hazard Ratio<sup>a</sup> of Heart Failure in Adoptees, Stratified by Affected Parent**

|                                              | No biological parental heart failure | Biological parental heart failure | No adoptive parental heart failure | Adoptive parental heart failure |
|----------------------------------------------|--------------------------------------|-----------------------------------|------------------------------------|---------------------------------|
| <b>Cardiomyopathies included</b>             |                                      |                                   |                                    |                                 |
| Person-years at risk                         | 844 228                              | 167 010                           | 828 375                            | 182 863                         |
| Cases/persons at risk                        | 135/18192                            | 59/3451                           | 155/17887                          | 39/3756                         |
| Incidence rate per 1000 person years         | 0.16 (0.13-0.19)                     | 0.35 (0.27-0.46)                  | 0.19 (0.16-0.22)                   | 0.21 (0.15-0.29)                |
| Incidence ratio                              | 1 [Reference]                        | 2.21 (1.62-2.99)                  | 1 [Reference]                      | 1.14 (0.79-1.61)                |
|                                              | <i>Odds ratio (95% CI)</i>           |                                   | <i>Odds ratio (95% CI)</i>         |                                 |
| Model 1                                      | 1 [Reference]                        | 1.78 (1.31 – 2.41)                | 1 [Reference]                      | 0.88 (0.62 – 1.25)              |
| Model 2                                      | 1 [Reference]                        | 1.49 (1.01 – 2.03)                | 1 [Reference]                      | 0.81 (0.57 – 1.15)              |
| Model 3                                      | 1 [Reference]                        | 1.40 (1.01 – 1.94)                | 1 [Reference]                      | 0.83 (0.58 – 1.18)              |
| <b>Cardiomyopathies excluded<sup>b</sup></b> |                                      |                                   |                                    |                                 |
| Person-years at risk                         | 825 608                              | 150 032                           | 807 625                            | 168 015                         |
| Cases/persons at risk                        | 79/17796                             | 37/3092                           | 93/17444                           | 23/3444                         |
| Incidence rate per 1000 person years         | 0.10 (0.076-0.12)                    | 0.25 (0.17-0.34)                  | 0.12 (0.093-0.14)                  | 0.14 (0.087-0.21)               |
| Incidence ratio                              | 1 [Reference]                        | 2.58 (1.73-3.79)                  | 1 [Reference]                      | 1.19 (0.74-1.85)                |
|                                              | <i>Odds ratio (95% CI)</i>           |                                   | <i>Odds ratio (95% CI)</i>         |                                 |
| Model 1                                      | 1 [Reference]                        | 2.04 (1.38 – 3.03)                | 1 [Reference]                      | 0.91 (0.58 – 1.43)              |
| Model 2                                      | 1 [Reference]                        | 1.59 (1.07 – 2.36)                | 1 [Reference]                      | 0.80 (0.51 – 1.26)              |
| Model 3                                      | 1 [Reference]                        | 1.50 (0.98 – 2.28)                | 1 [Reference]                      | 0.77 (0.48 – 1.24)              |

Abbreviations: CI, confidence interval. Model 1=univariate model; Model 2=adjusted for adoptee birth year, sex, county, and education; Model 3=adjusted for adoptee birth year, sex, county, education, coronary heart disease, hypertension, valvular heart disease, diabetes mellitus, and chronic obstructive pulmonary disease. <sup>a</sup> Risks are presented as hazard ratios (95 % confidence interval) derived from Cox regression models with time ranging from 1964 or date of birth to date of emigration, death, diagnosis of HF or end of follow-up December 31 2015). <sup>b</sup> All adoptees diagnosed with cardiomyopathy, or that had a biological or adoptive parent diagnosed with cardiomyopathy, were excluded.

**eTable 5. Heritability of Heart Failure Based on Estimated Population Prevalence and Tetrachoric Correlation in the Case-Control Study. Individuals With Cardiomyopathies Included**

| Exposed cases | Unexposed cases | OR   | Prevalence % | Tetrachoric correlation (SE) | $h^2 \pm SE \%$ |
|---------------|-----------------|------|--------------|------------------------------|-----------------|
| 58            | 133             | 1.49 | 0.1          | 0.07 (0.03)                  | 14 ± 6          |
| 58            | 133             | 1.49 | 0.6          | 0.08 (0.03)                  | 16 ± 6          |
| 58            | 133             | 1.49 | 1.0          | 0.09 (0.04)                  | 18 ± 8          |
| 58            | 133             | 1.49 | 5.0          | 0.11 (0.05)                  | 22 ± 10         |
| 58            | 133             | 1.49 | 8.0          | 0.12 (0.05)                  | 24 ± 10         |
| 58            | 133             | 1.49 | 10.0         | 0.12 (0.05)                  | 25 ± 10         |
| 58            | 133             | 1.49 | 12.0         | 0.13 (0.05)                  | 25 ± 10         |

Abbreviations: SE, Standard error; OR, Odds ratio.

**eTable 6. Heritability of Heart Failure Based on Estimated Population Prevalence and Tetrachoric Correlation in the Case-Control study. Individuals With Cardiomyopathy Excluded**

| Exposed cases | Unexposed cases | OR   | Prevalence % | Tetrachoric correlation (SE) | $h^2 \pm SE \%$ |
|---------------|-----------------|------|--------------|------------------------------|-----------------|
| 37            | 77              | 1.64 | 0.1          | 0.09 (0.04)                  | 18±8            |
| 37            | 77              | 1.64 | 0.5          | 0.10 (0.04)                  | 20±8            |
| 37            | 77              | 1.64 | 1.0          | 0.11 (0.05)                  | 22±10           |
| 37            | 77              | 1.64 | 5.0          | 0.14 (0.06)                  | 28±12           |
| 37            | 77              | 1.64 | 8.0          | 0.15 (0.06)                  | 30±12           |
| 37            | 77              | 1.64 | 10.0         | 0.15 (0.07)                  | 31±14           |
| 37            | 77              | 1.64 | 12.0         | 0.16 (0.07)                  | 32±14           |

Abbreviations: SE, Standard error; OR, Odds ratio.

**eTable 7. Odds Ratio<sup>a</sup> of Heart Failure in Adoptees, Stratified by Affected Parent (Cohort Study). Only Adoptees With Both Biological and Both Adoptive Parents Identified Included**

|                                              | No biological parental heart failure | Biological parental heart failure | No adoptive parental heart failure | Adoptive parental heart failure |
|----------------------------------------------|--------------------------------------|-----------------------------------|------------------------------------|---------------------------------|
| <b>Cardiomyopathies included</b>             |                                      |                                   |                                    |                                 |
| Person-years at risk                         | 513 358                              | 122 205                           | 481 733                            | 153 830                         |
| Cases/persons at risk                        | 107/10 862                           | 49/2511                           | 122/10 222                         | 34/3151                         |
| Incidence rate per 1000 person years         | 0.21 (0.17-0.25)                     | 0.40 (0.30-0.53)                  | 0.25 (0.21-0.31)                   | 0.22 (0.15-0.31)                |
| Incidence ratio                              | 1 [Reference]                        | 1.92 (1.36-2.69)                  | 1 [Reference]                      | 0.87 (0.59-1.27))               |
|                                              | <i>Odds ratio (95% CI)</i>           |                                   | <i>Odds ratio (95% CI)</i>         |                                 |
| Model 1                                      | 1 [Reference]                        | 2.00 (1.42–2.81)                  | 1 [Reference]                      | 0.90 (0.62-1.32)                |
| Model 2                                      | 1 [Reference]                        | 1.48 (1.04–2.09)                  | 1 [Reference]                      | 0.75 (0.51 – 1.10)              |
| Model 3                                      | 1 [Reference]                        | 1.46 (1.01–2.11)                  | 1 [Reference]                      | 0.77 (0.51 – 1.15)              |
| <b>Cardiomyopathies excluded<sup>b</sup></b> |                                      |                                   |                                    |                                 |
| Person-years at risk                         | 494 703                              | 109 464                           | 462 495                            | 141 672                         |
| Cases/persons at risk                        | 67/10 468                            | 31/2245                           | 78/9815                            | 20/2898                         |
| Incidence rate per 1000 person years         | 0.14 (0.11-0.17)                     | 2.09 (1.35-3.18)                  | 0.17 (0.13-0.21)                   | 0.14 (0.86-0.22)                |
| Incidence ratio                              | 1 [Reference]                        | 2.58 (1.73-3.79)                  | 1 [Reference]                      | 0.84 (0.50-1.35))               |
|                                              | <i>Odds ratio (95% CI)</i>           |                                   | <i>Odds ratio (95% CI)</i>         |                                 |
| Model 1                                      | 1 [Reference]                        | 2.17 (1.42–3.34)                  | 1 [Reference]                      | 0.87 (0.53–1.42)                |
| Model 2                                      | 1 [Reference]                        | 1.52 (0.98–2.35)                  | 1 [Reference]                      | 0.69 (0.42 – 1.14)              |
| Model 3                                      | 1 [Reference]                        | 1.54 (0.97–2.44)                  | 1 [Reference]                      | 0.70 (0.42–1.16)                |

Abbreviations: CI, confidence interval. Model 1=univariate model; Model 2=adjusted for adoptee birth year, sex, county, and education; Model 3=adjusted for adoptee birth year, sex, county, education, coronary heart disease, hypertension, valvular heart disease, diabetes mellitus, and chronic obstructive pulmonary disease. <sup>a</sup> Risks are presented as odds ratios (95 % confidence interval) derived from unconditional logistic regression. <sup>b</sup> All adoptees diagnosed with cardiomyopathy, or that had a biological or adoptive parent diagnosed with cardiomyopathy, were excluded.



**eTable 8. Odds Ratio<sup>a</sup> of Heart Failure (HF) in Adoptees, Stratified by Affected Parent (Case-Control Study)<sup>b</sup>. Only Adoptees With Both Biological and Both Adoptive Parents Identified included**

|                                                                                                                                                                                                                                                                                                                                                                                                                                                                                                                                                                                                                                                                                                                                                                                                                                                                   | No. of cases | No. of controls | All ages <sup>c</sup>                       | Age ≤ 45 yr. <sup>d</sup> | Age 46-59 yr. <sup>e</sup> | Age ≥60 yr. <sup>f</sup> |
|-------------------------------------------------------------------------------------------------------------------------------------------------------------------------------------------------------------------------------------------------------------------------------------------------------------------------------------------------------------------------------------------------------------------------------------------------------------------------------------------------------------------------------------------------------------------------------------------------------------------------------------------------------------------------------------------------------------------------------------------------------------------------------------------------------------------------------------------------------------------|--------------|-----------------|---------------------------------------------|---------------------------|----------------------------|--------------------------|
| <b>Cardiomyopathies included</b>                                                                                                                                                                                                                                                                                                                                                                                                                                                                                                                                                                                                                                                                                                                                                                                                                                  |              |                 | <i>Odds ratio (95% Confidence Interval)</i> |                           |                            |                          |
| Biological parental HF                                                                                                                                                                                                                                                                                                                                                                                                                                                                                                                                                                                                                                                                                                                                                                                                                                            | 46           | 172             | 1.51 (1.02 – 2.25)                          | 1.17 (0.39– 3.50)         | 1.85 (1.09– 3.12)          | 1.16 (0.55– 2.43)        |
| No biological parental HF                                                                                                                                                                                                                                                                                                                                                                                                                                                                                                                                                                                                                                                                                                                                                                                                                                         | 105          | 583             | 1 [Reference]                               | 1 [Reference]             | 1 [Reference]              | 1 [Reference]            |
| <b>Adoptive parental HF</b>                                                                                                                                                                                                                                                                                                                                                                                                                                                                                                                                                                                                                                                                                                                                                                                                                                       |              |                 | <i>Odds ratio (95% Confidence Interval)</i> |                           |                            |                          |
| Adoptive parental HF                                                                                                                                                                                                                                                                                                                                                                                                                                                                                                                                                                                                                                                                                                                                                                                                                                              | 31           | 206             | 0.68 (0.45 – 1.05)                          | 0.46 (0.11– 1.85)         | 0.52 (0.28– 0.95)          | 1.16 (0.58– 2.29)        |
| No adoptive parental HF                                                                                                                                                                                                                                                                                                                                                                                                                                                                                                                                                                                                                                                                                                                                                                                                                                           | 120          | 549             | 1 [Reference]                               | 1 [Reference]             | 1 [Reference]              | 1 [Reference]            |
| <b>Cardiomyopathies excluded<sup>g</sup></b>                                                                                                                                                                                                                                                                                                                                                                                                                                                                                                                                                                                                                                                                                                                                                                                                                      |              |                 | <i>Odds ratio (95% Confidence Interval)</i> |                           |                            |                          |
| Biological parental HF                                                                                                                                                                                                                                                                                                                                                                                                                                                                                                                                                                                                                                                                                                                                                                                                                                            | 30           | 104             | 1.69 (1.03 – 2.78)                          | 1.00 (0.19– 5.28)         | 2.23 (1.14– 4.35)          | 1.26 (0.53– 2.98)        |
| No biological parental HF                                                                                                                                                                                                                                                                                                                                                                                                                                                                                                                                                                                                                                                                                                                                                                                                                                         | 65           | 371             | 1 [Reference]                               | 1 [Reference]             | 1 [Reference]              | 1 [Reference]            |
| <b>Adoptive parental HF</b>                                                                                                                                                                                                                                                                                                                                                                                                                                                                                                                                                                                                                                                                                                                                                                                                                                       |              |                 | <i>Odds ratio (95% Confidence Interval)</i> |                           |                            |                          |
| Adoptive parental HF                                                                                                                                                                                                                                                                                                                                                                                                                                                                                                                                                                                                                                                                                                                                                                                                                                              | 18           | 119             | 0.70 (0.40 – 1.22)                          | 0.46 (0.05– 4.70)         | 0.59 (0.26– 1.32)          | 0.89 (0.39– 2.03)        |
| No adoptive parental HF                                                                                                                                                                                                                                                                                                                                                                                                                                                                                                                                                                                                                                                                                                                                                                                                                                           | 77           | 356             | 1 [Reference]                               | 1 [Reference]             | 1 [Reference]              | 1 [Reference]            |
| Abbreviations: HF, heart failure. <sup>a</sup> Odds ratios derived from unconditional logistic regression. <sup>b</sup> Cases and controls matched by sex, birth year (± 5 years), county of birth and level of education, and stratified by adoptee age at diagnosis. <sup>c</sup> Numbers of adoptee cases and controls per category of affected parents as specified in left columns. <sup>d</sup> Total number of 37 cases and 185 controls; 17 cases and 102 controls with cardiomyopathies excluded. <sup>e</sup> 99 cases and 495 controls; 58 cases and 348 controls with cardiomyopathies excluded. <sup>f</sup> 55 cases and 275 controls; 39 cases and 234 controls with cardiomyopathies excluded. <sup>g</sup> All adoptees diagnosed with cardiomyopathy, or that had a biological or adoptive parent diagnosed with cardiomyopathy, were excluded. |              |                 |                                             |                           |                            |                          |

**eTable 9. Odds Ratio<sup>a</sup> of Heart Failure (HF) in Adoptees, Stratified by Affected Biological Parents, in Relation to Coronary Heart Disease (CHD) (Cohort Design). Individuals With Cardiomyopathies Included**

|                                       | No Biological Parental HF  | Biological parental HF without CHD | Biological parental HF and CHD <sup>b</sup> |
|---------------------------------------|----------------------------|------------------------------------|---------------------------------------------|
| <b>Adoptee HF without CHD</b>         | <i>Odds ratio (95% CI)</i> |                                    |                                             |
| Model 1                               | 1 [Reference]              | 2.67 (1.58-4.49)                   | 1.95 (1.21-3.14)                            |
| Model 2                               | 1 [Reference]              | 1.88 (1.11-3.20)                   | 1.38 (0.85-2.24)                            |
| Model 3                               | 1 [Reference]              | 1.93 (1.12-3.34)                   | 1.13 (0.68-1.88)                            |
| <b>Adoptee HF and CHD<sup>b</sup></b> | <i>Odds ratio (95% CI)</i> |                                    |                                             |
| Model 1                               | 1 [Reference]              | 2.13 (0.96-4.72)                   | 2.70 (1.50-4.84)                            |
| Model 2                               | 1 [Reference]              | 1.22 (0.54-2.73)                   | 1.49 (0.83-2.71)                            |
| Model 3                               | 1 [Reference]              | 1.46 (0.63-3.36)                   | 1.25 (0.67-2.35)                            |

Abbreviations: CHD, coronary heart disease; HF, heart failure; CI, confidence interval. Model 1=univariate model; Model 2=adjusted for adoptee birth year, sex, county, and education; Model 3=adjusted for adoptee birth year, sex, county, education, coronary heart disease, hypertension, valvular heart disease, diabetes mellitus, and chronic obstructive pulmonary disease.<sup>a</sup> Risks are presented as odds ratios (95 % confidence interval) derived from unconditional logistic regression.<sup>b</sup> Patients registered with both CHD and HF regardless of order of events.

**eTable 10. Odds Ratio<sup>a</sup> of Heart Failure (HF) in Adoptees<sup>b</sup>, Stratified by Affected Biological Parents and by Sex (Cohort Study). Individuals with cardiomyopathies included**

|                        | No Biological Parental HF  | Biological paternal HF | Biological maternal HF |
|------------------------|----------------------------|------------------------|------------------------|
| <b>All adoptees</b>    | <i>Odds ratio (95% CI)</i> |                        |                        |
| Model 1                | 1 [Reference]              | 1.65 (1.07–2.55)       | 3.11 (2.07–4.67)       |
| Model 2                | 1 [Reference]              | 1.20 (0.77–1.87)       | 1.81 (1.19 – 2.74)     |
| Model 3                | 1 [Reference]              | 1.14 (0.71–1.81)       | 1.77 (1.14 – 2.77)     |
| <b>Male adoptees</b>   | <i>Odds ratio (95% CI)</i> |                        |                        |
| Model 1                | 1 [Reference]              | 1.67 (1.04-2.67)       | 2.15 (1.30-3.55)       |
| Model 2                | 1 [Reference]              | 1.25 (0.78-2.01)       | 1.29 (0.77-2.15)       |
| Model 3                | 1 [Reference]              | 1.03 (0.62-1.71)       | 1.11 (0.63-1.95)       |
| <b>Female adoptees</b> | <i>Odds ratio (95% CI)</i> |                        |                        |
| Model 1                | 1 [Reference]              | 1.56 (0.77-3.18)       | 5.31 (3.02-9.32)       |
| Model 2                | 1 [Reference]              | 1.10 (0.54-2.25)       | 3.08 (1.72-5.51)       |
| Model 3                | 1 [Reference]              | 1.45 (0.68-3.06)       | 3.65 (1.97-6.77)       |

Abbreviations: HF, heart failure; CI, confidence interval. Model 1=univariate model; Model 2=adjusted for adoptee birth year, sex, county, and education; Model 3=adjusted for adoptee birth year, sex, county, education, coronary heart disease, hypertension, valvular heart disease, diabetes mellitus, and chronic obstructive pulmonary disease. <sup>a</sup> Risks are presented as odds ratios (95 % confidence interval) derived from unconditional logistic regression. <sup>b</sup> Adoptees with both biological parents affected with HF were excluded.
